# Supplementary material
Source: publisher figshare collection journal article supplement (https://karger.figshare.com/ndownloader/files/24153251)
Supplement: Supplementary file 1 [file 24153251]

**Sup Figure 1: Scheme of the *GNAS* locus**. Schematic diagram of the human GNAS cluster with DMRs (lollipops indicate the methylation pattern: in red maternally imprinted and in blue, paternally ones). The arrows show initiation and direction of transcription for maternal (mat)- and paternal (pat)-derived transcripts (in red and blue, respectively). Each box or vertical line represent each exon (empty boxes, when exons give rise to noncoding RNAs). *GNAS* exon 1 (1Gsα) is outlined in red to indicate that *GNAS* is preferentially expressed from maternal allele in some tissues (proximal renal tubules, neonatal brown adipose tissue, thyroid, gonads, paraventricular nucleus of the hypothalamus and pituitary). Discontinue lines represent the alternative splicing of each isoforms derived from *GNAS* cluster (the alternative splicing of 2-13 exons of *GNAS* gene were omitted).
